# Supplementary material
Source: publisher figshare collection journal article supplement (https://future-science-group.figshare.com/articles/dataset/_/19328756)
Supplement: Supplementary file 1 [file 1]

## Sheet: MPNs
iD	diagnosis	driverMutation	brca2Methylation	relativeBrca2Mrna	relativeBrca2Protein	Signature.3	otherMutations*	drugResponseAUC	rad50Methylation	pold1Methylation	top3bMethylation	fen1Methylation	Signature.1	Signature.2	Signature.4	Signature.5	Signature.6	Signature.7	Signature.8	Signature.9	Signature.10	Signature.11	Signature.12	Signature.13	Signature.14	Signature.15	Signature.16	Signature.17	Signature.18	Signature.19	Signature.20	Signature.21	Signature.22	Signature.23	Signature.24	Signature.25	Signature.26	Signature.27	Signature.28	Signature.29	Signature.30
M401	ET	triple negative	0.085536						0.271014	0.146012	0.092845	0.165539
M402	ET	JAK2	0.064898						0.170349	0.215034	0.124058	0.069163
M405	ET	MPL	0.145658						0.181053	0.428403	0.138569	0.080177
M406	ET	JAK2	0.2699	0.696205	0.509949	0.253283		84.42	0.137649	0.301813	0.093317	0.121	0.191205	0	0.090265	0	0.207385	0	0	0	0	0	0.126731	0	0	0	0	0	0	0	0	0	0	0	0	0	0	0	0	0	0
M408	ET	triple negative	0.12751						0.248389	0.392794	0.103227	0.185832
M409	ET	JAK2	0.189445						0.160417	0.091608	0.083241	0.071196
M410	ET	triple negative	0.208732	1	0.821351	0.271775		45.92	0.144829	0.071547	0.115933	0.107733	0.278237	0	0	0	0.227616	0	0	0	0	0	0	0	0	0	0	0	0	0	0	0	0	0	0	0	0.070078	0	0	0	0
M411	ET	CALR	0.214962						0.129837	0.010004	0.107687	0.133868
M412	ET	JAK2	0.316277						0.248721	0.125614	0.093331	0.064332
M413	ET	JAK2	0.06675	0.739524	0.528101	0.381872	NM_001127208.3(TET2):exon3:c.1864C>T (Q622*)	59.26	0.382944	0.532941	0.10685	0.080977	0.141471	0	0	0.0609735	0.240531	0	0	0	0	0	0	0	0	0	0	0	0	0	0	0.0624155	0	0	0	0	0	0	0	0	0
M414	ET	triple negative	0.065903						0.118296	0.11834	0.133669	0.067868
M415	PV	JAK2	0.103846						0.158157	0.213757	0.101542	0.100766
M416	ET	triple negative	0.154821						0.12525	0.143183	0.108289	0.161023
M419	PV	JAK2	0.19948						0.373227	0.183215	0.090428	0.06805
M421	ET-LT	JAK2	0.696658	0.545849	0.463009	0.436568		62.48	0.82763	0.180461	0.195208	0.12462	0.324626	0	0	0	0.210161	0	0	0	0	0	0	0	0	0	0	0	0	0	0	0	0	0	0	0	0	0	0	0	0
M422	PV	JAK2	0.211573						0.199302	0.135006	0.114327	0.12114
M424	ET	JAK2	0.064162						0.25104	0.359257	0.109802	0.109821
M425	ET	JAK2	0.18694						0.286018	0.104469	0.100845	0.122742
M427	PV	JAK2	0.298011						0.103796	0.299918	0.078233	0.13797
M429	ET	triple negative	0.396863	0.921084	0.465596	0.28623		71.71	0.385354	0.07132	0.069795	0.135685	0	0	0	0.159853	0.274564	0.0666701	0	0	0	0	0	0	0	0	0	0	0	0	0	0.0704449	0	0	0	0	0	0	0	0	0
M430	PV	JAK2	0.064022						0.041614	0.244325	0.076261	0.150517
M432	PV	triple negative	0.096887	0.607073	0.528195	0.434045		69.97	0.170715	0.10507	0.12095	0.086365	0.148799	0	0	0	0.202933	0	0	0	0	0	0	0	0	0	0	0	0	0	0	0	0	0	0	0	0	0	0	0	0
M433	ET	triple negative	0.283749						0.486062	0.045648	0.149571	0.161746
M434	ET	CALR	0.191066						0.308763	0.016553	0.071629	0.082912
M435	ET	JAK2	0.40646						0.663343	0.303358	0.096703	0.18611
M436	ET	JAK2	0.281213						0.256466	0.267108	0.115394	0.09509
M438	ET	CALR	0.207244	0.640945	0.908364	0.190655		66.26	0.27149	0.422995	0.107625	0.194151	0.326333	0	0	0.122016	0.0987838	0	0	0	0	0	0.0703569	0	0	0	0	0	0	0	0.0983848	0	0	0	0	0	0	0	0	0	0
M439	ET	JAK2	0.252555						0.141834	0.335818	0.0672	0.038677
M440	ET	JAK2	0.368917						0.464835	0.393239	0.112729	0.114415
M441	ET	CALR	0.0915						0.422858	0.125062	0.131244	0.052215
M442	PV	triple negative	0.111853	0.471728	1	0.376009	NM_058216(RAD51C):exon8:c.G1000T:p.E334*	39.93	0.225852	0.176025	0.141294	0.216556	0.284011	0	0	0	0	0	0	0	0	0	0	0	0	0	0	0	0	0	0.0676159	0	0	0	0	0	0.0796117	0	0	0	0
M444	ET	JAK2	0.381173						0.185108	0.250664	0.088475	0.091074
M445	PV	JAK2	0.394825						0.112728	0.38266	0.099324	0.032019
M446	PV	JAK2	0.161109						0.09296	0.19682	0.122986	0.039961
M447	ET	triple negative	0.206238	0.725631	0.422569	0.295482		79.73	0.406083	0.484579	0.12811	0.095798	0.290527	0	0	0	0.202813	0.0643494	0	0	0	0	0	0	0	0	0	0	0	0	0	0	0	0	0.0783304	0	0	0	0	0	0
M449	ET	JAK2	0.059597						0.047201	0.242892	0.085493	0.058761
M452	ET	JAK2	0.141243						0.111158	0.475902	0.129729	0.082696
M454	ET	JAK2	0.134083	0.811218	0.469148	0		49.25	0.227673	0.093728	0.169521	0.12943	0.386606	0	0	0.171971	0	0	0	0	0	0	0.147965	0	0	0	0	0	0	0	0.149619	0	0	0	0	0	0	0	0	0	0
M457	ET	triple negative	0.242228						0.395316	0.066019	0.166836	0.119071
M458	ET-LT	JAK2	0.185378	0.706901	0.317066	0.416566	NM_000059.3(BRCA1):exon27:c.9753del:p.(K3251Nfs*24)	40.62	0.263165	0.18691	0.123097	0.070848	0.322491	0	0	0	0.124514	0	0	0	0	0	0	0	0	0	0	0	0	0.0666089	0	0	0	0	0	0	0	0	0	0	0
M461	ET	triple negative	0.068901						0.296255	0.030166	0.124586	0.093294
M462	ET	JAK2	0.068067						0.181885	0.30081	0.138907	0.045573
M463	PMF	JAK2	0.17579						0.278627	0.231235	0.109974	0.098584
M464	PMF	JAK2	0.137539	0.681969	0.435474	0.234011		75.79	0.22351	0.155917	0.173594	0.145249	0.367036	0	0	0.13	0.133596	0	0	0	0	0	0	0	0	0	0	0	0	0	0	0.0665961	0	0	0	0	0	0	0	0	0
M466	PMF	triple negative	0.233258						0.159082	0.248771	0.128297	0.069492
M467	ET	JAK2	0.07097	0.636967	0.414835	0.407252		71.49	0.496613	0.080562	0.101313	0.14901	0.207846	0	0	0	0.26219	0	0	0	0	0	0	0	0	0	0	0	0	0	0	0	0	0	0	0	0	0	0	0	0
M470	ET	JAK2	0.338421						0.217605	0.136614	0.165552	0.072838
M473	ET	CALR	0.149601						0.174584	0.096172	0.132215	0.052493
M475	PMF	CALR	0.037058	0.709582	0.456678	0.285636		55.11	0.043098	0.378223	0.115182	0.05921	0.364217	0	0	0.0774867	0.114321	0	0	0	0	0	0	0	0	0	0.0627156	0	0	0	0	0	0	0	0	0	0	0	0	0	0
M476	ET	triple negative	0.229287						0.127484	0.237055	0.135095	0.126204
M477	ET	JAK2	0.138248						0.386258	0.280056	0.140492	0.165347
M478	PV	triple negative	0.203972						0.316565	0.302189	0.084926	0.020954
M480	PMF-LT	triple negative	0.727655	0.343259	0.527183	0.496639	NM_015338.6(ASXL1):exon12:c.1867C>T (Q623*)	60.6	0.535245	0.22558	0.210351	0.230085	0.15886	0	0	0.0817122	0.194252	0	0	0	0	0	0	0	0	0	0	0	0	0	0	0	0	0	0	0	0	0	0	0	0
M482	ET	JAK2	0.087628				NM_015338.6(ASXL1):exon12:c.1867C>T (Q623*)		0.599977	0.357893	0.125028	0.073636
M484	ET	CALR	0.119564						0.163085	0.452177	0.149476	0.071787
M486	ET	triple negative	0.124935						0.30728	0.359414	0.099888	0.09452
M490	PMF	JAK2	0.114758	0.543762	0.604385	0.101665		90.61	0.107987	0.205942	0.086974	0.052104	0.216156	0	0	0.0812659	0.190754	0	0	0	0	0	0.125661	0	0	0	0	0	0	0	0.133033	0.0784861	0	0	0	0	0	0	0	0	0
M493	ET	JAK2	0.063087						0.112926	0.285072	0.174314	0.12609
M494	ET	JAK2	0.073654						0.082056	0.408472	0.11074	0.168757
M495	ET	CALR	0.07647	0.969034	0.689839	0.221991		80.35	0.065764	0.277523	0.118249	0.082676	0.125684	0	0	0.207296	0.28289	0	0	0	0	0	0	0	0	0	0	0	0	0	0	0	0	0	0	0	0	0	0	0	0
M498	ET	triple negative	0.094879						0.093076	0.377337	0.101156	0.08538
M500	ET	CALR	0.167764						0.149981	0.415121	0.073917	0.169766
M501	ET	triple negative	0.03745						0.228954	0.436042	0.151078	0.124576
M502	ET	JAK2	0.199426	0.87143	0.527183	0.123625		80.9	0.285578	0.371132	0.140105	0.089102	0.275647	0	0	0.135865	0.103672	0.124125	0	0	0	0	0.174513	0	0	0	0	0	0	0	0	0	0	0	0	0	0	0	0	0	0
M503	ET	CALR	0.139623						0.197427	0.055205	0.138557	0.132594
M505	ET	triple negative	0.315276	0.833162	0.818881	0.291897		71.63	0.287847	0.115134	0.151743	0.057016	0.0691132	0	0	0	0.259793	0	0	0	0	0	0	0	0	0	0.117098	0	0	0	0	0	0	0	0.0789349	0	0	0	0	0	0
M507	PV	JAK2	0.083632						0.138829	0.10019	0.157	0.147855
M508	PV	JAK2	0.203334						0.06022	0.264552	0.142031	0.0928
M512	ET-LT	JAK2	0.841241	0.431987	0.138885	0.587411		22.87	0.490338	0.614141	0.093552	0.17285	0.27708	0	0	0	0.121098	0	0	0	0	0	0	0	0	0	0	0	0	0	0	0	0	0	0	0	0	0	0	0	0
M516	PV	triple negative	0.587052	0.325563	0.21272	0.385678		56.34	0.440474	0.359998	0.104082	0.162937	0.195265	0	0	0	0.280468	0	0	0	0	0	0	0	0	0	0	0	0	0	0	0	0	0	0	0	0	0	0	0	0.0819717
M518	PV	JAK2	0.377079						0.077854	0.4758	0.113	0.172099
M520	ET	triple negative	0.156672						0.263992	0.392233	0.102809	0.068691
M522	ET	JAK2	0.075982	0.786168	0.64233	0.250703		44.86	0.336059	0.332838	0.139482	0.058017	0.174518	0	0	0.119972	0.284963	0	0	0	0	0	0	0	0	0	0	0	0	0	0	0	0	0	0	0	0	0	0	0	0
M523	ET	JAK2	0.231431						0.376451	0.270415	0.145192	0.071503
M524	PV-LT	JAK2	0.624952	0.362769	0.446512	0.445703		13.35	0.487463	0.466199	0.136722	0.170521	0.115945	0	0	0	0.304262	0.0822786	0	0	0	0	0	0	0	0	0	0	0	0	0	0	0	0	0	0	0	0	0	0	0
M525	PMF	JAK2	0.152963						0.236481	0.172083	0.081481	0.063557
M527	ET	triple negative	0.126104						0.332546	0.072524	0.103092	0.037531
M529	PV	JAK2	0.05964	0.71301	0.70547	0.424057		73.52	0.239064	0.161868	0.112995	0.050072	0.230725	0	0	0	0	0	0	0	0	0	0	0	0	0	0	0	0	0	0.109085	0	0	0	0	0	0	0	0	0	0
M530	ET	JAK2	0.053278						0.0382	0.034897	0.12572	0.126088
M531	ET	JAK2	0.185002	0.876272	0.51348	0.327366		78.2	0.098421	0.326959	0.087289	0.068523	0.232402	0	0	0	0.211308	0	0	0	0	0	0.0828281	0	0	0	0	0	0	0.0854283	0	0	0	0	0	0	0	0	0	0	0
*Deleterious mutations involving MIPSS-high molecular risk genes ASXL1, EZH2, SRSF2, IDH1/2, U2AF1 and 241 DDR genes

## Sheet: helathyDonor
iD	Diagnosis	brca2Methylation	rad50Methylation	pold1Methylation	top3bMethylation	fen1Methylation
HSZC103	healthyDonor	0.059269	0.047932	0.063508	0.104766	0.110219
HSZC104	healthyDonor	0.093717	0.400884	0.141363	0.11776	0.049348
HSZC105	healthyDonor	0.031386	0.062112	0.078838	0.094625	0.076116
HSZC106	healthyDonor	0.062906	0.12507	0.099699	0.109776	0.050234
HSZC107	healthyDonor	0.017186	0.23028	0.122277	0.050883	0.100448
HSZC108	healthyDonor	0.088237	0.244276	0.221641	0.051335	0.043051
HSZC109	healthyDonor	0.063095	0.069001	0.158487	0.063567	0.099289
HSZC110	healthyDonor	0.068294	0.065136	0.19494	0.096181	0.080526
HSZC114	healthyDonor	0.077178	0.032118	0.085858	0.088218	0.041703
HSZC115	healthyDonor	0.128697	0.017097	0.084271	0.038437	0.060371
HSZC116	healthyDonor	0.077305	0.152612	0.344847	0.088288	0.053347
HSZC117	healthyDonor	0.016279	0.024154	0.051479	0.034365	0.067718
HSZC118	healthyDonor	0.033047	0.134652	0.065937	0.124463	0.110596
HSZC119	healthyDonor	0.035954	0.237609	0.113697	0.114141	0.059682
HSZC121	healthyDonor	0.129997	0.091633	0.259378	0.098214	0.099532
HSZC122	healthyDonor	0.099262	0.028505	0.186767	0.075388	0.086906
HSZC123	healthyDonor	0.106969	0.162544	0.06969	0.053429	0.104334
HSZC124	healthyDonor	0.021168	0.016101	0.229332	0.060095	0.144944
HSZC126	healthyDonor	0.030934	0.130076	0.19518	0.055444	0.119563
HSZC127	healthyDonor	0.080855	0.051818	0.219851	0.082837	0.126896
HSZC128	healthyDonor	0.159216	0.035214	0.169958	0.105127	0.084413
HSZC129	healthyDonor	0.166554	0.108147	0.249124	0.101299	0.098861
HSZC130	healthyDonor	0.241422	0.095781	0.092272	0.100706	0.085625
HSZC131	healthyDonor	0.122441	0.233823	0.052717	0.023976	0.133316
HSZC132	healthyDonor	0.133516	0.18112	0.298528	0.10702	0.076252
HSZC135	healthyDonor	0.081431	0.048831	0.215896	0.04168	0.122635
HSZC136	healthyDonor	0.02448	0.1485	0.048844	0.059742	0.02344
HSZC137	healthyDonor	0.026166	0.043188	0.22441	0.108271	0.075949
HSZC138	healthyDonor	0.070921	0.084231	0.112402	0.040006	0.043396
HSZC139	healthyDonor	0.123713	0.201966	0.255463	0.06486	0.190411
HSZC140	healthyDonor	0.092243	0.084615	0.146195	0.045779	0.072347
HSZC141	healthyDonor	0.255825	0.303431	0.278699	0.086286	0.122712
HSZC142	healthyDonor	0.010042	0.110115	0.092642	0.069157	0.030623
HSZC143	healthyDonor	0.050333	0.128147	0.079772	0.149229	0.070001
HSZC144	healthyDonor	0.026421	0.076475	0.251563	0.03233	0.140391
HSZC145	healthyDonor	0.14598	0.026515	0.210844	0.112937	0.06179
HSZC146	healthyDonor	0.071304	0.093182	0.032941	0.086142	0.14151
HSZC147	healthyDonor	0.042425	0.057458	0.157039	0.173705	0.087423
HSZC148	healthyDonor	0.136706	0.1057	0.216664	0.078218	0.065267
HSZC150	healthyDonor	0.056839	0.043635	0.216216	0.128102	0.047998
HSZC151	healthyDonor	0.030318	0.050034	0.095874	0.14697	0.09308
HSZC152	healthyDonor	0.060108	0.141693	0.174727	0.08008	0.084632
HSZC153	healthyDonor	0.074149	0.064961	0.117518	0.113976	0.055158
HSZC154	healthyDonor	0.088206	0.104476	0.11304	0.07112	0.126369
HSZC155	healthyDonor	0.143427	0.037131	0.111045	0.134555	0.064228
HSZC156	healthyDonor	0.104852	0.054829	0.313379	0.127044	0.038585
HSZC157	healthyDonor	0.073273	0.120801	0.184053	0.095269	0.053839
HSZC159	healthyDonor	0.034072	0.019562	0.107745	0.102476	0.096993
HSZC160	healthyDonor	0.188784	0.05629	0.068419	0.076234	0.129785
HSZC161	healthyDonor	0.012018	0.342885	0.038004	0.049258	0.022931

## Sheet: M421M512
Date	iD	diagnosis	driverMutation	brca2Methylation	rad50Methylation	pold1Methylation	top3bMethylation	fen1Methylation
2017-05-19	M421	ET	JAK2	0.232684	0.313672	0.160502	0.164272	0.06623
2018-06-15	M421	ET	JAK2	0.252887	0.330224	0.15019	0.16543	0.084449
2020-03-03	M421	ET	JAK2	0.385571	0.427206	0.166324	0.180981	0.116655
2020-04-27	M421	ET-LT	JAK2	0.696658	0.82763	0.180461	0.195208	0.12462
2018-07-13	M512	ET-FirstDiagnosis	JAK2	0.232356	0.128449	0.310594	0.106513	0.143865
2020-10-14	M512	ET	JAK2	0.263308	0.17456	0.338601	0.106866	0.120703
2021-02-19	M512	ET	JAK2	0.414947	0.302048	0.505438	0.11049	0.15149
2021-03-14	M512	ET-Progression(thrombocytopenia)	JAK2	0.641867	0.34716	0.611684	0.113493	0.168322
2021-05-08	M512	ET-LT	JAK2	0.841241	0.490338	0.614141	0.103552	0.17285
